# Supplementary material
Source: PubMed Central journal article supplement (PMC8761261)
Supplement: NIHMS1742977-supplement-2.pdf [file NIHMS1742977-supplement-2.pdf]

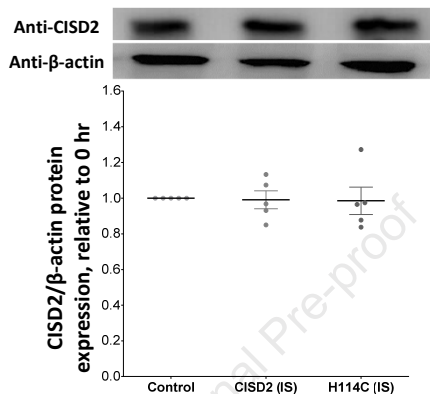

**Supplementary Figure S1.** Protein blot analysis of CISD2 expression in Control, CISD2 and H114C cells without Doxycycline (DOX; 0 $\mu$ g/ml) application. Protein blots (Top) and  $\beta$ -actin-normalized expression graph (Bottom) showing CISD2 protein levels in all cell lines. Results are shown as mean  $\pm$  SE of 5 biological control averages, each conducted with 3 technical repeats N=5; one sample t-test.

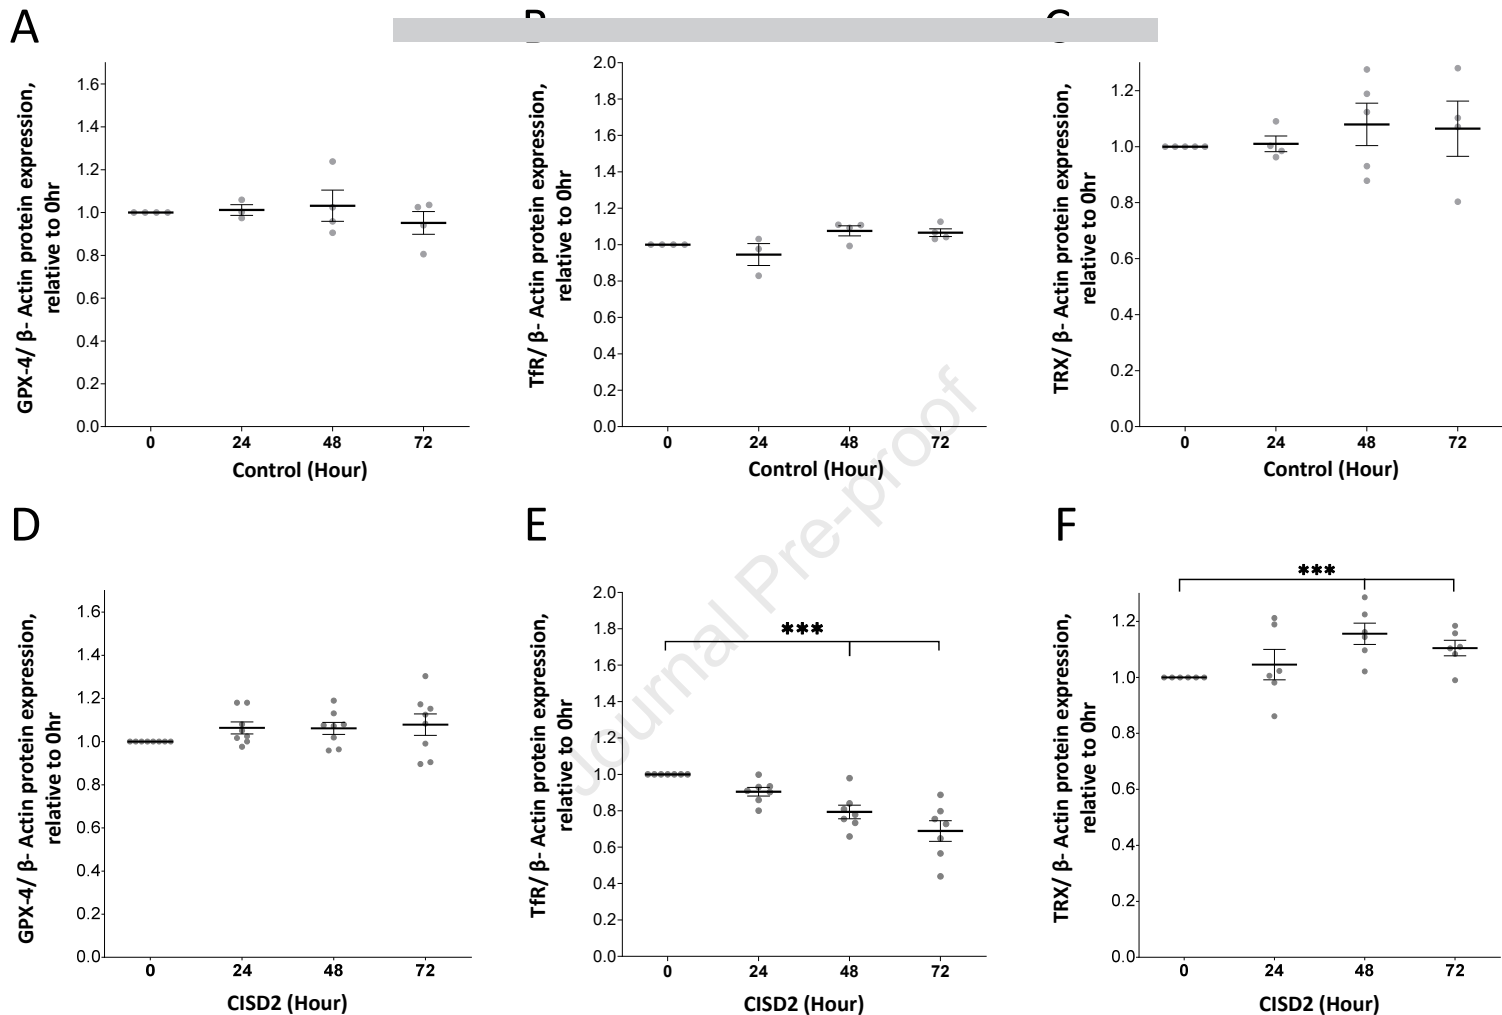

**Supplementary Figure S2.** Detection of ferroptosis markers in Control and CISD2 cells following Doxycycline (DOX; 2 $\mu$ g/ml) application. **A-C.** Expression of glutathione peroxidase 4 (GPX4; A), transferrin receptor (TfR; B), and mitochondrial thioredoxin 2 (TRX; C) in Control cells following DOX (2 $\mu$ g/ml) application for 0, 24, 48, and 72 hours. **D-F.** Expression of GPX4 (D), TfR (E), and TRX (F) in CISD2 cells following DOX (2 $\mu$ g/ml) application for 0, 24, 48, and 72 hours. Results are shown as mean  $\pm$  SE of 5 or 7 biological control averages, each conducted with 3 technical repeats. \*\*\* $P < 0.001$ ; N=5 (A), N=7 (B); one sample t-test.

## 118 Unique proteins expressed in H114C

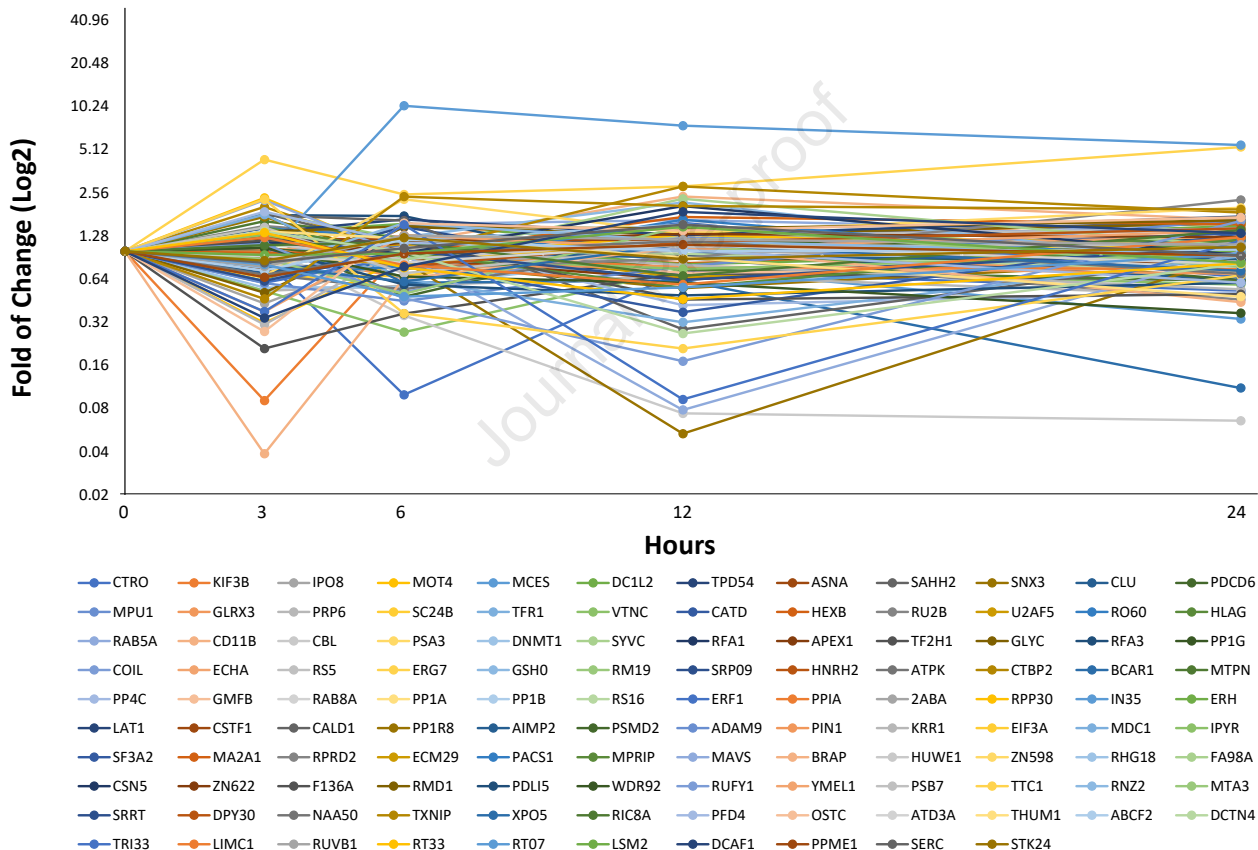

**Supplementary Figure S3.** Expression pattern of the 118 unique proteins expressed in H114C (Figure 5A, 5B). All proteins shown were found to be significantly expressed ( $P < 0.05$ ;  $N = 3$ ) compared to time 0 hour by a one-way Welch ANOVA.
